# Supplementary material for: Huntingtin loss in hepatocytes is associated with altered metabolism, adhesion, and liver zonation
Source: PubMed Central journal article supplement (PMC10327156; doi:10.1101/2023.06.24.546334), 2023-06-26
Supplement: NIHPP2023.06.24.546334V1-supplment-1.pdf [file NIHPP2023.06.24.546334V1-supplment-1.pdf]

## Supplemental Tables

| Parent A                                         | Parent B                                        | Expected | Observed | <i>p</i> -value |
|--------------------------------------------------|-------------------------------------------------|----------|----------|-----------------|
| <i>Htt<sup>fl/+</sup>;Alb<sup>cre/+</sup></i>    | <i>Htt<sup>fl/+</sup>;Alb<sup>cre/+</sup></i>   | 2.1875   | 2        | 0.89            |
| <i>Htt<sup>fl/+</sup>;Alb<sup>cre/+</sup></i>    | <i>Htt<sup>fl/+</sup>;Alb<sup>cre/cre</sup></i> | 4.375    | 1        | 0.11            |
| <i>Htt<sup>fl/fl</sup>;Alb<sup>cre/cre</sup></i> | <i>Htt<sup>fl/+</sup>;Alb<sup>cre/cre</sup></i> | 34.5     | 36       | 0.97            |

**Table S1.** Mendelian ratios with expected and observed homozygote pups. Pearson's chi-squared test *p*-values are reported for each pairing.

| Tissue                 | <i>Htt</i> <sup>+/+</sup> | <i>Htt</i> <sup>LKO/LKO</sup> | <i>p</i> -value |
|------------------------|---------------------------|-------------------------------|-----------------|
| Weight, g (SD)         | 26.5 (2.4)                | 24.4 (1.5)                    | <b>0.04</b>     |
| Liver, mg (SD)         | 1128.2 (179.3)            | 1033.2 (195.8)                | 0.28            |
| White adipose, mg (SD) | 719.4 (239)               | 649 (150.8)                   | 0.5             |
| Brown adipose, mg (SD) | 50.1 (8.3)                | 42.1 (6.8)                    | 0.09            |
| Spleen, mg (SD)        | 84.2 (16.7)               | 81.6 (16.7)                   | 0.73            |
| Brain, mg (SD)         | 495.5 (12.2)              | 496.2 (16.6)                  | 0.92            |

**Table S2.** Organ weights from 13-month mice. Significant t-test values are in bold.

| Analyte (Unit)       | <i>Htt</i> <sup>+/+</sup> | <i>Htt</i> <sup>LKO/LKO</sup> | p-value      |
|----------------------|---------------------------|-------------------------------|--------------|
| Glucose (mg/dL)      | 184.2                     | 186.0                         | 0.921        |
| BUN (mg/dL)          | 17.7                      | 22.8                          | <b>0.002</b> |
| Creatinine (mg/dL)   | 0.5                       | 0.5                           | 0.175        |
| BUN:creatinine ratio | 38.2                      | 45.6                          | <b>0.027</b> |
| Phosphorus (mg/dL)   | 6.7                       | 7.2                           | 0.359        |
| Total Protein (g/dL) | 3.1                       | 3.3                           | 0.185        |
| Albumin (g/dl)       | 1.5                       | 1.6                           | 0.465        |
| Globulin (g/dL)      | 1.6                       | 1.8                           | 0.165        |
| Alb:Glob ratio       | 1.0                       | 0.9                           | 0.363        |
| Bilirubin (mg/dL)    | 0.1                       | 0.2                           | 0.123        |
| GGT (U/L)            | 0.8                       | 0.4                           | 0.359        |
| ALT (U/L)            | 105.5                     | 114.6                         | 0.886        |
| AST (U/L)            | 214.8                     | 229.5                         | 0.838        |
| AST:ALT ratio        | 3.1                       | 2.5                           | 0.440        |
| Cholesterol (mg/dL)  | 41.2                      | 55.6                          | <b>0.003</b> |

**Table S3.** Analytes from clinical chemistry screen. Significant t-test comparisons ( $p < 0.05$ ) are in bold. Abbreviations: blood urea nitrogen (BUN), gamma-glutamyl transferase (GGT), alanine aminotransferase (ALT), aspartate aminotransferase (AST).

| Measure                  | <i>Htt</i> <sup>+/+</sup> | <i>Htt</i> <sup>LKO/LKO</sup> |
|--------------------------|---------------------------|-------------------------------|
| Lipid accumulation       | 0                         | 0                             |
| Hepatocyte swelling      | 0                         | 0                             |
| Fibrosis                 | 0                         | 0                             |
| Necrosis                 | 0                         | 0                             |
| Immune cell infiltration | 1                         | 1                             |
| Total score              | 1                         | 1                             |

**Table S4.** Median liver pathology scores. Scores: 0 = absent, 1 = mild, 2 = moderate, 3 = severe.

| Analyte (Unit)         | LLOQ  | <i>Htt</i> <sup>+/+</sup> |         | <i>Htt</i> <sup>LKO/LKO</sup> |         | <i>p</i> -value |
|------------------------|-------|---------------------------|---------|-------------------------------|---------|-----------------|
|                        |       | 6 mo                      | 13 mo   | 6 mo                          | 13 mo   |                 |
| CCL6 (ng/mL)           | 0.039 | 5.91                      | 7.11    | 10.24                         | 8.11    | <b>0.029</b>    |
| CRP (ug/mL)            | 0.33  | 3.19                      | 4.02    | 4.03                          | 4.26    | 0.129           |
| Eotaxin (pg/mL)        | 9.4   | 4458.33                   | 3526.67 | 4048.89                       | 2917.78 | <b>0.021</b>    |
| GCP-2 (ng/mL)          | 0.35  | 1.15                      | 0.78    | 1.31                          | 1.06    | 0.177           |
| GM-CSF (pg/mL)         | 1.2   | 8.24                      | 2.59    | 11.51                         | 1.62    | 0.462           |
| IL-12p40 (ng/mL)       | 0.85  | 18.28                     | 16.88   | 16.74                         | 17.28   | 0.818           |
| IL-17A (pg/mL)         | 12    | 74.6                      | 27.32   | 117.02                        | 23.26   | 0.268           |
| IL-1 $\alpha$ (pg/mL)  | 50    | 38.47                     | 24.48   | 61.36                         | 28.29   | 0.241           |
| IL-28 (pg/mL)          | 6     | 71.7                      | 10.23   | 86.12                         | 9.99    | 0.529           |
| IL-5 (pg/mL)           | 47    | 45.52                     | 57.08   | 53.8                          | 50.68   | 0.68            |
| IP-10 (pg/mL)          | 23    | 58.45                     | 52.82   | 63.44                         | 44.58   | 0.15            |
| KC/GRO (pg/mL)         | 6.7   | 89.62                     | 67.92   | 61.16                         | 63.69   | 0.096           |
| MCP-1 (pg/mL)          | 19    | 28.37                     | 23.53   | 29.36                         | 44.7    | 0.115           |
| M-CSF-1 (ng/mL)        | 0.06  | 0.61                      | 0.52    | 0.52                          | 0.47    | 0.248           |
| MDC (pg/mL)            | 1.4   | 316.33                    | 237.33  | 370.89                        | 235.11  | 0.573           |
| MIP-1 $\beta$ (pg/mL)  | 0.88  | 10.83                     | 11.98   | 11.01                         | 10.84   | 0.599           |
| MIP-1 $\gamma$ (ng/mL) | 0.17  | 13.13                     | 12.87   | 13.79                         | 14.46   | 0.141           |
| MMP-9 (ng/mL)          | 1.2   | 4.64                      | 4.92    | 4.15                          | 10.76   | 0.373           |
| SAP (ug/mL)            | 2.6   | 65.23                     | 90.42   | 80.39                         | 95.91   | 0.132           |
| SCF (pg/mL)            | 62    | 140.48                    | 118.62  | 168.78                        | 99.06   | 0.997           |
| TIMP-1 (ng/mL)         | 0.62  | 1                         | 0.67    | 1.25                          | 1.05    | <b>0.026</b>    |
| TNF $\alpha$ (pg/mL)   | 14    | 134.92                    | 23.53   | 214.67                        | 24.1    | 0.148           |
| TSLP (pg/mL)           | 5.3   | 20.35                     | 6.39    | 29.18                         | 4.97    | 0.445           |
| VCAM-1 (ng/mL)         | 2.2   | 593.67                    | 715.83  | 603.78                        | 846.89  | 0.053           |
| VEGF-A (pg/mL)         | 4.2   | 11.31                     | 11.27   | 13                            | 9.28    | 0.851           |

**Table S5.** Analytes from rodent MAP4.0 (Ampersand Biosciences). Significant genotype ANOVA comparison ( $p < 0.05$ ) are in bold. Abbreviations: Chemokine (C-C motif) ligand (CCL), C-reactive protein (CRP), Granulocyte Chemotactic Protein (GCP), Granulocyte-Macrophage Colony-Stimulating Factor (GM-CSF), interleukin (IL), interferon gamma-induced protein (IP), Growth-Regulated Protein alpha (KC/GRO), monocyte chemoattractant protein (MCP), macrophage colony-stimulating factor (M-CSF), macrophage-derived chemokine (MDC), macrophage inflammatory proteins (MIP), Matrix metalloproteinase (MMP), Serum Amyloid P component (SAP), Stem Cell Factor (SCF), tissue inhibitor of metalloproteinase (TIMP), Tumor Necrosis Factor (TNF), Thymic stromal lymphopoietin (TSLP), Vascular cell adhesion protein (VCAM), vascular endothelial growth factor-A (VEGF-A). Inflammation markers measured below lower limit of quantitation (LLOQ with LLOQ listed: IFN $\beta$  (112 pg/mL), IFN $\gamma$  (1.1 pg/mL), IL-10 (5.7 pg/mL), IL-12p70 (21 pg/mL), IL-18 (208 pg/mL), IL-1 $\beta$  (3 pg/mL), IL-2 (11 pg/mL), IL-23 (35 pg/mL), IL-27 (28 pg/mL), IL-4 (2.8 pg/mL), IL-6 (3.9 pg/mL), IL-9 (132 pg/mL), Insulin (40 mUI/ml), MIP-1 $\alpha$  (221 pg/mL), PAI-1 (0.26 ng/mL), RAGE (0.42 ng/mL), TPO (0.046 ng/mL).

| Experiment              | Age          | N/group        | Sex    | Statistical tests             |
|-------------------------|--------------|----------------|--------|-------------------------------|
| Bodyweight              | 3-12 months  | 11 WT, 20 LKO  | Female | Repeated measure ANOVA        |
| Medelian ratio          | 1 month      | See Table S1   | Mixed  | Pearson's chi-squared         |
| HTT protein blots       | 12 month     | 4              | Mixed  | T-test, bonferroni adjustment |
| Organ weights           | 13 months    | See Table S2   | Female | T-test                        |
| Liver pathology scoring | 6 months     | 5 WT, 11 LKO   | Female | N/A                           |
| Plasma chemistry        | 6 months     | 11             | Female | T-test                        |
| Bile acid measurement   | 2 months     | 163 WT, 34 LKO | Female | T-test                        |
| GTT                     | 6, 13 months | 10             | Female | T-test                        |
| ITT                     | 6, 13 months | 10             | Female | T-test                        |
| PTT                     | 6, 13 months | 10             | Female | T-test                        |
| Liver blistering        | 3-9 months   | variable       | Mixed  | N/A                           |
| RNAseq - DEGs           | 9 months     | 6              | Female | Moderated T-test              |
| EnrichR Pathways        | 9 months     | 6              | Female | Odds ratio                    |
| IHC - CYP1A2            | 6-months     | 6              | Male   | T-test                        |
| IHC - CYP2E1            | 6-months     | 6              | Male   | T-test                        |
| IHC - CDH1              | 6-months     | 6              | Male   | T-test                        |
| IHC - CDH2              | 6-months     | 3              | Male   | T-test                        |
| APAP challenge          | 6-months     | 9 WT, 7 LKO    | Male   | T-test                        |

Table S6. Summary of age, N, sex, and statistical test for each experiment.
